# Supplementary material for: Gastropods underwent a major taxonomic turnover during the end-Triassic marine mass extinction event
Source: PLoS One. 2022 Nov 2;17(11):e0276329. doi: 10.1371/journal.pone.0276329 (PMC9629647; doi:10.1371/journal.pone.0276329)
Supplement: S3 Table — (XLSX) [file pone.0276329.s004.xlsx]

## Sheet: Hoja1
		SUBCLASS	GENERA/SUBGENERA	STRATIGRAPHIC AND GEOGRAPHIC DISTRIBUTION	REFERENCES
		HETEROBRANCHIA	Amphitomaria? KOKEN, 1897	Norian/North America	Nützel & Erwin, 2004
			Camponaxis BANDEL, 1994 (=Z. beneckei in HAAS, 1953)	Carnian-Norian-Rhaetian/ Tethys, Peru	Bandel, 1994; Gründel & Nützel, 2013
			Carinathilda? GRÜNDEL, 1997	Norian/Iran	Nützel et al., 2012
			Conactaeon MEEK, 1863	Norian-Rhaetian/Peru	Haas, 1953
			Consobrinella HAAS, 1953	Norian-Rhaetian/Peru	Haas, 1953
			Cylindrobullina VON AMMON, 1878	Carnian-Norian-Rhaetian/Peru, Iran,Tethys	Haas, 1953; Nützel & Sesewbary-Daryan, 1999
			Domerionina GRÜNDEL, 2012	Carnian-Norian-Rhaetian?/Tethys	Gründel, 2012; Bandel, 1994
			Euconactaeon MEEK, 1863	Norian-Rhaetian/Peru	Haas, 1953
			Promathildia ANDREAE, 1887 (=Clathrobaculus COSSMANN, 1912)	Norian-Rhaetian/Peru,Tethys, Mexico, North America	Haas, 1953; Stanley et al., 1994; Nützel et al., 2003a; Mander et al., 2008; Nützel & Erwin, 2004
			Sinuarbullina GRÜNDEL, 1997	Carnian-Norian-Rhaetian?/Tethys	Gründel, 2012; Bandel, 1995
			Siphonilda NÜTZEL & ERWIN, 2004	Norian/North America	Nützel & Erwin, 2004
			Teretrina COSSMANN, 1912	Norian-Rhaetian/Peru, Iran?, North America	Nützel et al., 2012; Nützel & Erwin, 2004
		CAENOGASTROPODA	Acilia? KOKEN, 1896	Norian/Iran	Nützel et al., 2012; Tong & Erwin, 2001
			Allocosmia (Z. (Allocosmia) COSSMANN, 1897	Norian-Rhaetian/Peru	Haas, 1953
			Allostrophia (Z.(Allostrophia) KITTL, 1894	Norian-Rhaetian/Peru	Haas, 1953
			Ampezzopleura? BANDEL, 1991	Norian/North America	Nützel & Erwin, 2004
			Andangularia HAAS, 1953	Norian-Rhaetian/Peru, North America, Alaska	Haas, 1953; Mc Roberts & Blodgett, 2002; Nützel & Erwin, 2004;
			Angularia KOKEN, 1892	Norian-Rhaetian/North America, Iran	Nützel & Senowbary-Daryan, 1999; Blodgett et al. (personal data, unpublished); Nützel & Erwin, 2004
			Anoptychia (=Z. (Anoptychia) KOKEN, 1892	Norian-Rhaetian/Peru, North America, Iran	Haas, 1953; Nützel et al., 2003-a
			Anulifera ZAPFE, 1962	Norian-Rhaetian/Iran, China?	Nützel & Senowbary-Daryan, 1999
			Aporrhais DA COSTA, 1778 (=A. (Cuphosolenus PIETTE, 1876)	Norian-Rhaetian/Peru	Haas, 1953
			Chulitnacula FRÝDA & BLODGETT, 2001	Norian/North America, Alaska, Iran	Frýda & Blodgett, 2001, McRoberts & Blodgett, 2002
			Coelostylina (Gradiella KITTL, 1899)	Norian-Rhaetian/China	Tong & Erwin, 2001
			Coelostylina KITTL, 1894	Norian-Rhaetian/Iran, Peru, North America, Alaska	Nützel et al., 2012; Haas, 1953; McRoberts & Blodgett, 2002; Tong & Erwin, 2001; Nützel & Erwin, 2004
			Cryptaulax TATE, 1869 (= Xystrella)	Norian-Rhaetian/Iran, Peru, North America, Alaska	Haas, 1953; Mc Roberts & Blodgett, 2002; Nützel et al., 2003; Nützel & Senowbary-D, 1999; Nützel & Erwin, 2004
			Diatrypesis TOMLIN, 1929	Norian/North America	Nützel & Erwin, 2004
			Ederazyga PIERONI ET AL., 2021	Norian-Rhaetian/Iran,Tethys	Pieroni et al., 2021
			Euchrysalis LAUBE, 1870	Norian/North America	Nützel & Erwin, 2004
			Euthystylus COSSMANN, 1895	Norian-Rhaetian/Peru, Iran	Haas, 1953; Nützel & Senowbay-Daryan, 1999;
			Gigantogonia COSSMANN, 1909	Norian-Rhaetian/Peru	Haas, 1953
			Glyptochrysalis KOKEN, 1896	Norian-Rhaetian/Peru	Haas, 1953
			Heterospira KOKEN, 1897	Norian-Rhaetian/Peru	Haas, 1953
			Idahospira NÜTZEL & ERWIN, 2004	Norian/North America	Nützel & Erwin, 2004
			Katosira KOKEN, 1892	Norian-Rhaetian/Iran, Peru, Alaska	Nützel et al., 2012; Haas, 1953; McRoberts & Blodgett, 2002
			Kittliconcha BONARELLI, 1927	Norian-Rhaetian/Peru	Haas, 1953
			Kittlistylus HAAS, 1953	Norian-Rhaetian/Peru	Haas, 1953
			Lamelliphorus COSSMANN, 1915	Norian/North America	Nützel & Erwin, 2004
			Maturifusus SZABÓ, 1983	Norian/North America	Nützel & Erwin, 2004
			Moerkeia BÖHM, 1895	Norian-Rhaetian/Iran	Nützel & Senowbary-Daryan, 1999
			Occidentocerithium NÜTZEL ET AL., 2003	Norian/North America	Nützel et al., 2003
			Omphaloptycha VON AMMON, 1893	Norian-Rhaetian/Peru, North America, Mexico, Alaska	Stanley et al., 1994; Haas, 1953; McRobert & Blodgett, 2002; Tong & Erwin, 2001; Nützel & Erwin, 2004
			Oonia? GEMMELLARO, 1878	Norian-Rhaetian/Peru	Haas, 1953
			Paracerithium COSSMANN, 1902	Norian-Rhaetian/Peru	Haas, 1953
			Parangularia KUTASSY,	Norian/Tethys	Szabó, 2011
			Polygyrina? KITTL, 1894 (= Euthystylus)	Norian/North America, Iran	Nützel & Erwin, 2004; Nützel & Senowbary.Daryan, 1999
			Praelittorina KUTASSY, 1937	Norian/North America	Nützel & Erwin, 2004;
			Protofusus BONARELLI, 1921	Norian-Rhaetian/Peru	Haas, 1953
			Protorcula KITTL, 1894	Norian-Rhaetian/Peru, North America, Iran	Nützel et al., 2003, 2012; Haas, 1953; Nützel & Senowbary-Daryan, 1999
			Provermicularia KITTL, 1899	Norian/ Tethys	Sepkoski, 2002; Bieler & Petit, 2011; Benton, 1993; PBDB
			Pseudobrochidium GRUPE, 1907	Norian/Tethys	Sepkoski, 2002; PBDB
			Pseudoscalites KITTL,	Norian-Rhaetian/Peru, North America	Haas, 1953; Nützel & Erwin, 2004
			Pseudotritonium? WENZ (=Palaeotriton KITTL, 1894)	Norian-Rhaetian/Peru	Haas, 1953
			Ptychostoma LAUBE, 1868	Norian/North America, Mexico	Nützel & Erwin, 2001, 2004
			Purpuroidea LYCETT, 1848	Norian-Rhaetian/Iran, North America	Nützel et al., 2003; Kittl, 1912; Blodgett et al. (personal data, unpublished); Stanley, 1977
			Pustulifer COSSMANN, 1909	Norian-Rhaetian/Peru	Haas, 1953
			Ramina? WENZ, 1938	Norian-Rhaetian/Peru	Haas, 1953
			Rhabdocolpus COSSMANN, 1906	Norian-Rhaetian/Peru	Haas, 1953
			Rhynchocerithium COSSMANN, 1906	Norian-Rhaetian/Iran	Nützel et al., 2012; Nützel & Senowbary-Daryan, 1999
			Settsassia BANDEL, 1992	Norian/North America	Nützel & Erwin, 2004
			Silberlingiella FRYDA & BLODGETT, 2003	Norian/North America	Frýda & Blodgett, 2003
			Spirochrysalis KITTL, 1894	Norian/Tethys	Sepkoski, 2002; PBDB; Kittl, 1894
			Spirocyclus WENZ, 1938	Norian-Rhaetian/Tethys	Sepkoski, 2002; Kaim et al., 2006
			Spirostylus KITTL, 1894	Norian-Rhaetian/Peru, China, North America	Haas, 1953; Pan et al., 1977; Nützel & Erwin, 2004
			Stephanocosmia? COSSMANN, 1895	Norian/North America	Nützel & Erwin, 2004
			Stereokion GRUBER, 1932	Norian/North America	Nützel & Erwin, 2004
			Telleria KITTL, 1894	Norian/Tethys	Sepkoski, 2002; PBDB; Kittl, 1891
			Teutonica? SCHRÖDER, 1991	Norian/Iran	Nützel et al., 2012
			Toxoconcha KITTL, 1899	Norian-Rhaetian/Peru, Alaska	Haas, 1953; Mc Roberts & Blodgett, 2002; Tong & Erwin, 2001
			Tretospira KOKEN, 1892	Norian/North America	Nützel & Erwin, 2004
			Trypanostylus COSSMANN, 1895	Norian/Tethys, China	Tong & Erwin, 2001; Sepkoski, 2002; Kittl, 1899; PBDB
			Turristylus BLASCHKE, 1905	Norian/North America	Nützel et al., 2003
			Undularia KOKEN, 1892	Norian-Rhaetian/Peru, North America, Iran	Haas, 1953; Nützel et al., 2003; PBDB
			Zygopleura KOKEN, 1892	Norian-Rhaetian/Peru, Tethys, Iran	Haas, 1953; Mander et al., 2008; Nützel et al., 2010
		VETIGASTROPODA	Ambercyclus FERRARI ET AL., 2014 (=Eucyclus)	Norian-Rhaetian/Peru	Haas, 1953
			Ampezzalina BANDEL, 1993	Norian-Rhaetian/Iran	Nützel & Senowbary-Daryan, 1999
			Amphitrochus COSSMANN, 1907	Norian-Rhaetian/Peru	Haas, 1953
			Anomphalus MEEK & WORTHEN, 1866	Norian-Rhaetian/Peru	Haas, 1953
			Acrosolarium KOKEN, 1896	Norian/Tethys	Sepkoski, 2002; Bieler & Petit, 2005; Koken, 1896; PBDB
			Blodgettella NÜTZEL & ERWIN, 2004	Norian/North America	Nützel & Erwin, 2004
			Borestus? THOMAS, 1940	Norian/North America	Nützel & Erwin, 2004
			Brochidiella NÜTZEL & ERWIN, 2001	Norian/North America	Nützel & Erwin, 2001
			Brochidium KOKEN, 1889	Norian-Rhaetian/Peru	Haas, 1953
			Callotrochus KUTASSY, 1938	Norian-Rhaetian/Peru	Haas, 1953
			Chartronella COSSMANN, 1902	Norian-Rhaetian/Peru	Haas, 1953
			Cirsostylus COSSMANN, 1918	Norian/Tethys	Sepkoski, 2002; PBDB
			Colpomphalus COSSMANN, 1906	Norian-Rhaetian/Peru	Haas, 1953
			Discohelix DUNKER, 1847	Norian-Rhaetian/Peru	Haas, 1953
			Enantiostoma KOKEN, 1896	Norian/Tethys	Fryda, 1997; Sepkoski, 2002; PBDB
			Eocalliostoma HAAS, 1953	Norian-Rhaetian/Peru	Haas, 1953
			Eucycloscala COSSMANN, 1895	Norian-Rhaetian/Peru, North America, Mexico, Iran	Haas, 1953; Stanley et al., 1994; Nützel & Senowbay-Daryan, 1999; Nützel & Erwin, 2004
			Eunemopsis KITTL, 1891	Norian/Tethys	Nützel & Kaim, 2014; Bandel, 2010; Sepkoski, 2002
			Euryalox COSSMANN, 1896	Norian-Rhaetian/Tethys	Tong & Erwin, 2001; Nützel et al., 2018
			"Glabrocingulum"? THOMAS, 1940	Norian/Mexico	Stanley et al., 1994
			Gosseletina BAYLE IN FISCHER, 1885	Norian-Rhaetian/China	Tong & Erwin, 2001; Pan, 1997; Sepkoski, 2002
			Gudrunella NÜTZEL & ERWIN, 2004	Norian/North America	Nützel & Erwin, 2004
			Guidonia DE STAFANI, 1880	Norian-Rhaetian/Peru, Argentina, Mexico	Haas, 1953; Stanley et al., 1994; Riccardi et al, 2004
			Hesperocirrus HAAS, 1953	Norian-Rhaetian/Peru	Haas, 1953
			Homalopoma CARPENTER, 1864	Norian-Rhaetian/Peru	Haas, 1953; Cox, 1949
			Hyperacanthus? KOKEN, 1895	Norian-Rhaetian/Peru	Haas, 1953
			Jurassiphorus COSSMANN, 1915	Norian-Rhaetian/Peru, North America	Haas, 1953; Nützel & Erwin, 2004;
			Kokenella KITTL, 1891	Norian-Rhaetian/Iran, Tethys	Nützel & Senowbary-Daryan, 1999; Sepkoski, 2002
			Lepidotrochus? KOKEN, 1895	Norian-Rhaetian/Peru	Haas, 1953
			Morihikua BEGG & GRANT MCKIE, 2003	Norian-Rhaetian/New Zealand	Begg & Grant Mckie, 2003
			Nodoconus NÜTZEL & ERWIN, 2004	Noarian/North America	Nützel & Erwin, 2004
			Palaeocollonia (MÜNSTER, 1841)	Norian-Rhaetian/Tethys	Sepkoski, 2002; PBDB
			Pareuryalox HAAS, 1953	Norian-Rhaetian/Peru	Haas, 1953
			Platyacra? VON AMMON IN ZITTLE, 1882	Norian-Rhaetian/Peru	Haas, 1953
			Pleurotomaria DEFRANCE, 1826 (= Talantodiscus)	Norian-Rhaetian/New Zealand, Peru	Begg & Grant Mckie, 2003; Haas, 1953
			Ptychomphalus AGASSIZ, 1839 (= Ptychomphalina FISCHER, 1885)	Norian-Rhaetian/Peru, North America	Haas, 1953; Nutzel & Erwin, 2001
			Rhaphistomella KITTL, 1891	Norian/Tethys	Nützel & Kaim, 2014; Bandel, 2009; Sepkoski, 2002
			Pseudoclanculus COSSMANN, 1918	Norian/Tethys	Nützel & Kaim, 2014; Bandel, 2010; Sepkoski, 2002
			Sadkia CONTI & MONARI, 2001	Rhaetian/Tethys	Nützel & Hautmann, 2022 (unpublished)
			Sissenna KOKEN, 1896	Norian-Rhaetian/Peru, Tethys, China	Haas, 1953; Nützel, et al. 2018
			Solariella (Eosolariella) HAAS, 1953	Norian-Rhaetian/Peru	Haas, 1953
			Solariella WOOD, 1842	Norian-Rhaetian/Peru	Haas, 1953
			Solarioconulus COSSMANN, 1918	Norian-Rhaetian/Peru	Haas, 1953
			Sororcula HAAS, 1953	Norian-Rhaetian/Peru, North America	Haas, 1953; Blodgett et al. (personal data, unplublished); Nutzel & Erwin, 2004
			Spiniomphalus NÜTZEL & ERWIN, 2004	Norian/North America	Nützel & Erwin, 2004
			Stuorella KITTL, 1891	Norian-Rhaetian/Tethys	Nützel & Hautmann, 2022 (unpublished); Bandel, 2009; Sepkoski, 2002
			Tahua BEGG&GRANTMCKIE, 2003	Norian/New Zealand	Begg &Grant Mckie, 2003
			Trochonodus NÜTZEL ET AL., 2003 (=Riselloidea)	Norian-Rhaetian/Iran	Nützel & Senowbary-Daryan, 1999; Nützel et.al, 2003
			Trochotoma EUDES-DESLONGCHAMPS, 1843	Noarian/Tethys	Ferrari et al., 2015; Kochanová in Kollárová & Kochanová, 1973
			Trypanocochlea TOMLIN, 1931	Norian-Rhaetian/Peru	Haas, 1953
			Tylotrochus KOKEN, 1896	Norian/China	Tong & Erwin, 2001
			Ueckerconulus GRÜNDEL, 2000	Norian/North America	Nützel & Erwin, 2004
			Wortheniella SCHWARDT, 1992 (= Worthenia)	Norian-Rhaetian/Peru, North America, Mexico, Iran, Tethys	Haas, 1953; Nützel & Senowbary-Daryan, 1999; Douglas, 1929; Pieroni, 2019; Stanley et al., 1994; Nutzel & Erwin, 2001
			Yunnania MANSUY, 1912	Norian-Rhaetian/Iran, North America	Nützel & Senowbary-Daryan, 1999; Nützel & Erwin, 2004
		NERITIMORPHA	Bandelopsis FRÝDA ET AL., 2003	Norian/North America	Frýda et al., 2003
			Cassianopsis BANDEL, 2007	Norian/Rhaetian,Tethys	Nützel & Hautmann, 2022 (unpublished); Bandel, 2007
			Colubrella KOKEN, 1897	Norian/Tethys	Sepkoski, 2002; Koken, 1896; PBDB
			Delphinulopsis LAUBE, 1868	Norian/North America, Alaska	Blodgett et al., 2001
			Dicosmos CANAVARI, 1890	Norian-Rhaetian/Iran, North America	Nützel & Senowbary-Daryan, 1999; Nützel & Erwin, 2004
			Hologyra KOKEN, 1892	Norian-Rhaetian/Tethys	Bandel, 2007; Sepkoski, 2002; PBDB
			Hungariella KUTASSY, 1933	Norian/Tethys	Szabó, 2011
			Marmolatella KITTL, 1894	Norian-Rhaetian/Peru,Tethys	Haas, 1953; Tong & Erwin, 2001
			Natiria DE KONINCK, 1881	Norian-Rhaetian/Japan, China	Hayami & Kase, 1977; Tong & Erwin, 2001
			Neritaria KOKEN, 1892	Norain-Rhaetian/Peru, Alaska,Tethys, China	Haas, 1953; Mc Roberts & Blodgett, 2002; Tong & Erwin, 2001; Sha & Grant-Mackie, 1996
			Neritopsis GRATELOUP, 1832	Norian-Rhaetian/Peru, China, Tethys	Haas, 1953; Tong & Erwin, 2001; Sepkoski, 2002
			Nuetzelopsis FRÝDA ET AL., 2003	Norian/North America	Frýda et al., 2003
			Oncochilus VON ZITTLE, 1882	Norian-Rhaetian/Peru, Tethys	Haas, 1953; Bandel, 2007; Sepkoski, 2002; PBDB
			Paradelphinulopsis BLODGETT ET AL., 2001	Norian/North America, Alaska	Blodgett et al., 2001; Nützel & Erwin, 2004
			Palaeonarica KITTL, 1892	Norian/North America	Nützel & Erwin, 2004
			Platychilina KOKEN, 1892	Norian/North America	Blodgett et al. (personal data, unpublished)
			Seisia KUTASSY, 1934	Norian/North America, Alaska	Blodgett et al., 2001
			Spinidelphinulopsis BLODGETT ET AL., 2001	Norian/North America	Blodgett et al., 2002
			Symmetrocapulus DACQUÉ, 1933	Rhaetian/Tethys	Nützel & Hautmann, 2022 (unpublished)
			Trachynerita KITTL, 1894	Norian-Rhaetian/Peru, China, Iran	Haas, 1953; Sha & Grant-Mackie, 1996; Nützel & Senowbary-Daryan, 1999
			Wallowanerita BLODGET ET AL., 2001	Norian/North America	Blodgett et al., 2001
			Weitschatopsis FRÝDA ET AL., 2003	Norian/North America	Frýda et al., 2003; Nützel & Erwin, 2004
